# Supplementary material for: An ultrahigh mass-loading integrated high coulombic efficiency Si–graphite electrode for high-energy-density lithium ion batteries
Source: Royal Society of Chemistry journal article supplement (doi:10.1039/d3se00630a), 2023-01-01
Supplement: d3se00630a1.pdf [file d3se00630a1.pdf]

## Supporting Information

# Ultrahigh Mass-Loading Integrated High Coulombic Efficiency Si-Graphite Electrode for High-Energy-Density Lithium Ion Battery

Shu Zhang<sup>#, a</sup>, Yi Zhu<sup>#, a</sup>, **Xiandi Zhang<sup>a</sup>**, Fanglin Hu<sup>a</sup>, Wengao Zhao<sup>\*, b</sup>, Jianxuan Du<sup>b</sup>, Shuyue Xue<sup>a</sup>, Peng Li<sup>\*, a</sup> and Yu-Jia Zeng<sup>\*, c</sup>

<sup>a</sup> Department of Chemical Engineering, Shandong University of Technology, 255000, China

<sup>b</sup> Institute of Nanotechnology, Karlsruhe Institute of Technology (KIT), 76344 Eggenstein-Leopoldshafen, Germany

<sup>c</sup> Key Laboratory of Optoelectronic Devices and Systems of Ministry of Education and Guangdong Province, College of Physics and Optoelectronic Engineering, Shenzhen University, 518060, China

\* Corresponding author.

E-mail: Peng.Li.UPC@hotmail.com; wengao.zhao@kit.edu; yjzeng@szu.edu.cn

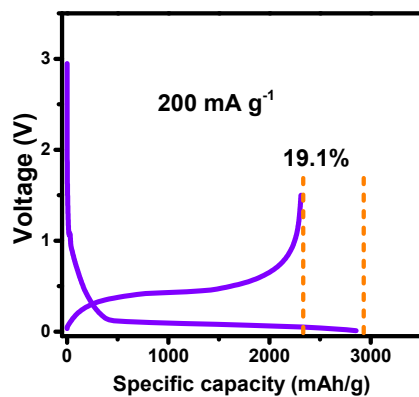

**Figure S1.** The initial charge/discharge curve of LB-Si/CT

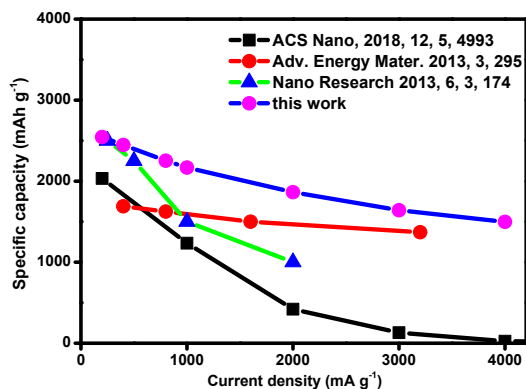

**Figure S2.** Comparison of rate performance with previous works.

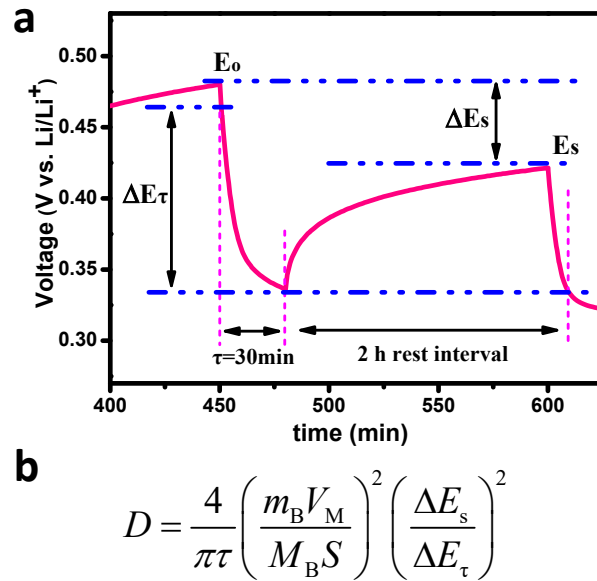

**Figure S3.** (a) Schematic representation and (b) simplified equation for diffusion coefficient calculation of the galvanostatic intermittent titration technique ( $\tau$ : duration of the current pulse;  $\Delta E_s$ : voltage change due to the current pulse;  $\Delta E_\tau$ : voltage change during the current pulse;  $m_B$ ,  $M_B$ ,  $V_M$ , and  $S$  are the active mass, molar mass, molar volume, and active surface area, respectively).

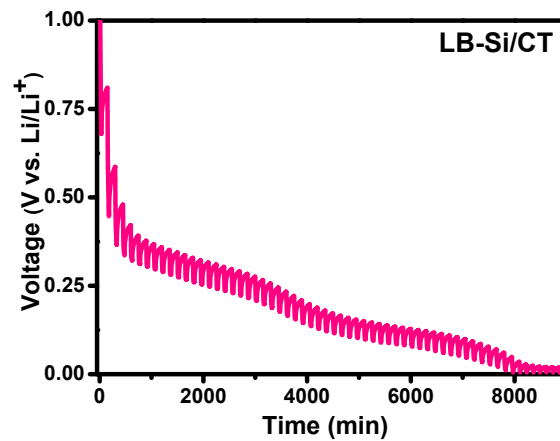

**Figure S4.** Galvanostatic intermittent titration technique test of LB-Si/CT

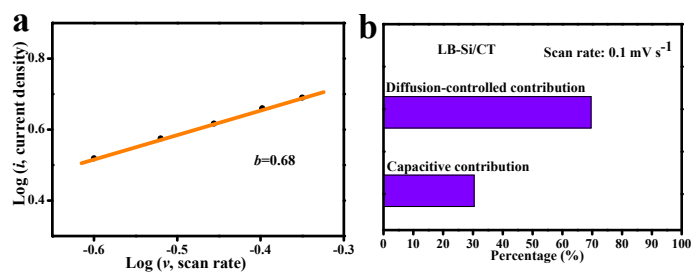

**Figure S5.** (a)  $\log(i)/\log(v)$  plots of LB-Si/CT at various scan rates from 0.25 to 0.45  $\text{mV s}^{-1}$  and (b) contribution ratio of capacitive- and diffusion-controlled charge at 0.1  $\text{mV s}^{-1}$ .

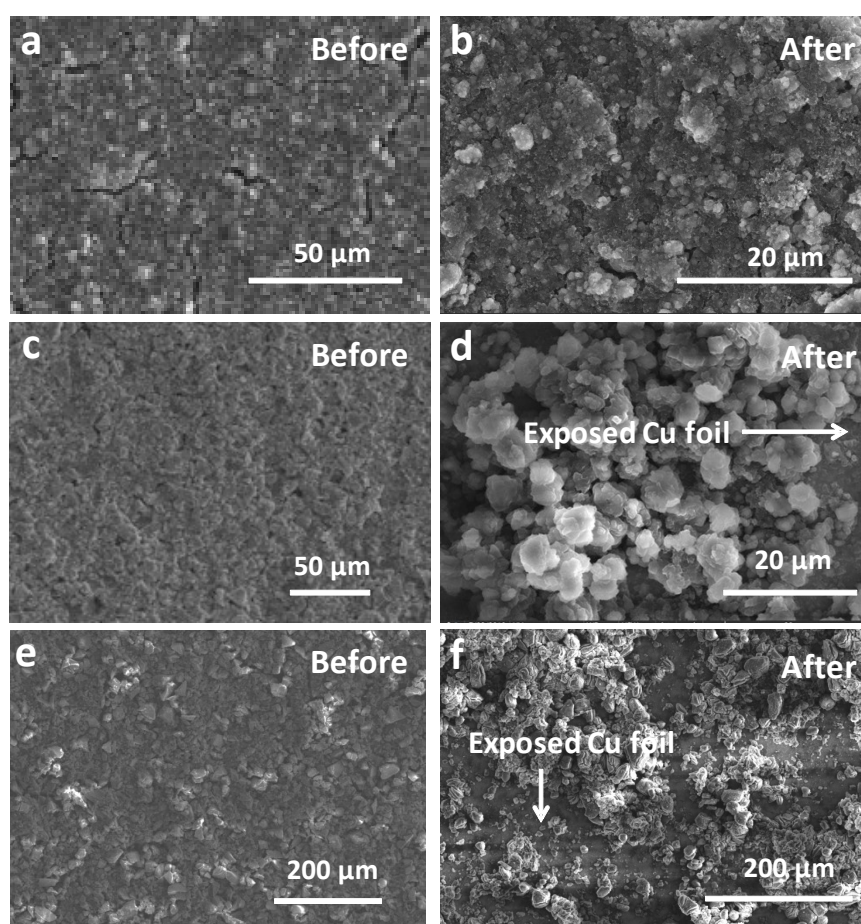

**Figure S6.** SEM images of (a, b) LB-Si/CT, (c, d) bare Si and (e, f) SiO precursor electrode surface before and after cycling.

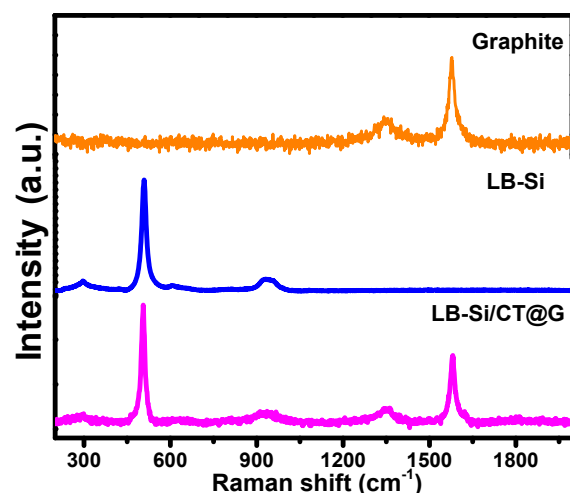

Figure S7. Raman spectra of graphite, LB-Si and LB-Si/CT@G.

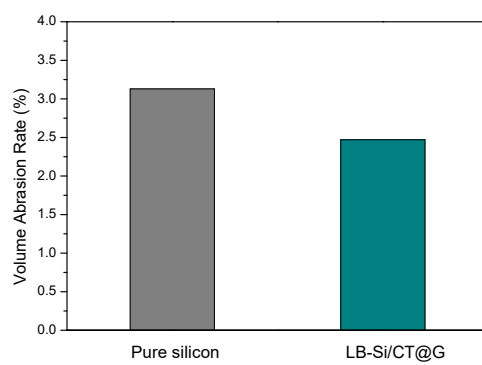

Figure S8. The volume abrasion rate of pure silicon and LB-Si/CT@G electrodes

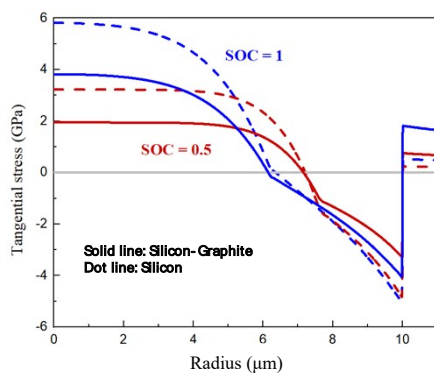

**Figure S9.** Tangential stress distribution of silicon-graphite electrode at SOC of 0.5 and 1

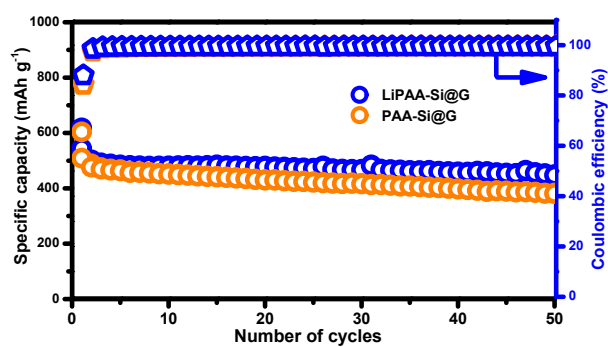

**Figure S10.** Cycling performance of LB-Si/CT@G electrodes with PAA or LiPAA binder.

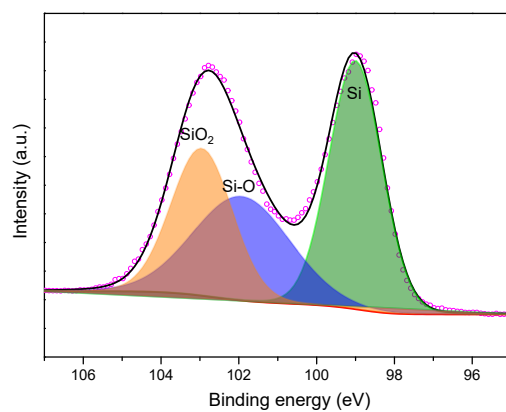

**Figure S11.** XPS spectra of Si 2p line

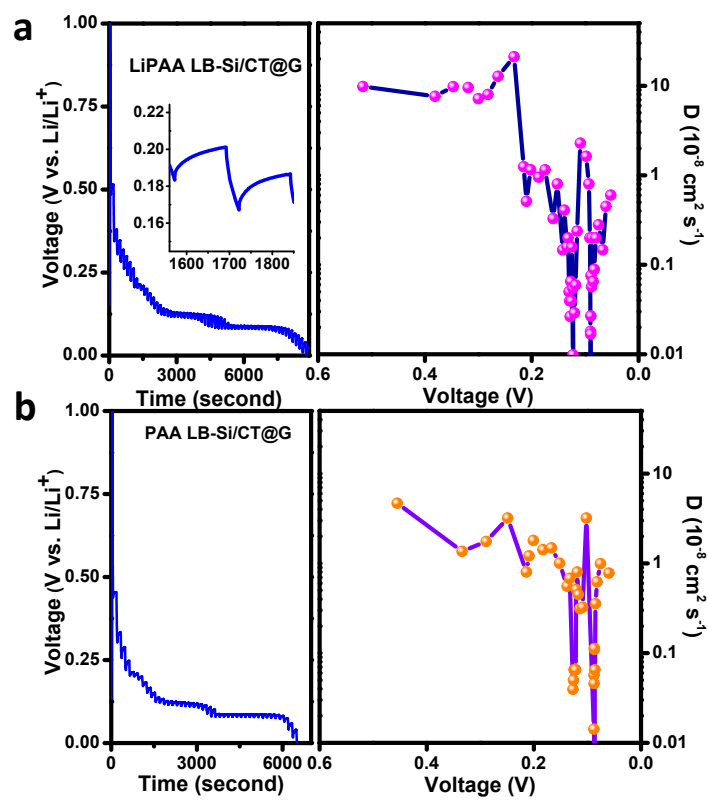

**Figure S12.** GITT test of LB-Si/CT@G with (a) LiPAA or (b) PAA binder and their corresponding diffusion coefficient plot.

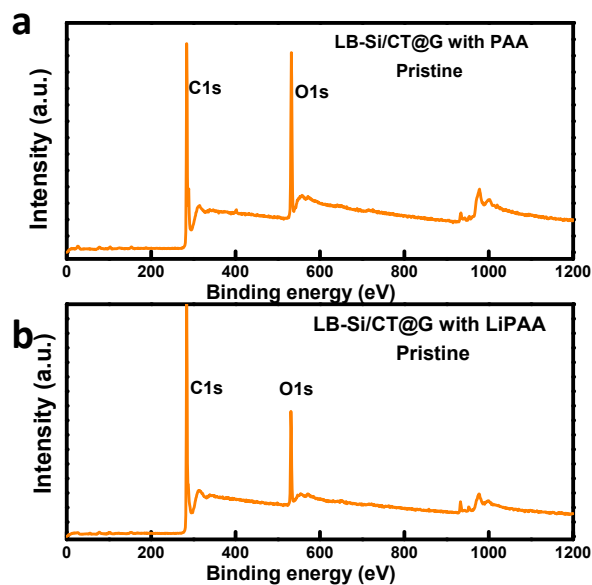

**Figure S13.** XPS analysis of LB-Si/CT@G with (a) PAA and (b) LiPAA before cycling.

**Table S1** The material design and electrochemical properties of typical silicon-based anodes

| Typical silicon anodes                                                      | Synthesis strategies                         | Main precursors                                                     | Synthesis conditions                                               | Areal capacity            | ICE   | Ref. |
|-----------------------------------------------------------------------------|----------------------------------------------|---------------------------------------------------------------------|--------------------------------------------------------------------|---------------------------|-------|------|
| Stress-Relieved Silicon Nanowires                                           | Hydrothermal Treatment                       | Zinc Acetate; Germanium Oxide; Si foil                              | 180 °C for 20 h                                                    | 0.64 mAh cm <sup>-2</sup> | 60.4% | [1]  |
| Hierarchical Graphene-Scaffolded Silicon/Graphite Composites                | Ball milling and acid assisted self-assembly | Silicon; Graphite; Graphene oxide; Ascorbic acid                    | 700 °C for 2 h; Ar/H <sub>2</sub>                                  | 0.62 mAh cm <sup>-2</sup> | 75.6% | [2]  |
| Microstructure Controlled Porous Silicon Particles                          | Arc melting                                  | Si, Al, Cu, and Fe metal                                            | Electric arc furnace; >3000 °C                                     | 1.18 mAh cm <sup>-2</sup> | 80.3% | [3]  |
| Silicon Nanoparticles Embedded in Micro-Carbon Sphere Framework             | Hydrothermal Treatment                       | Si nanoparticles; Sucrose; Oxalic acid                              | 200 °C for 10 h                                                    | 1.4 mAh cm <sup>-2</sup>  | 75%   | [4]  |
| 1D silicon-based nanostructures with different internal spaces              | Electrospinning                              | Polyvinylpyrrolidone; Tetraethyl orthosilicate; Acetic Acid         | 10 μL min <sup>-1</sup> extrusion rate; 15 kV accelerating voltage | 1.8 mAh cm <sup>-2</sup>  | 77%   | [5]  |
| Colloidal Synthesized Silicon-Carbon Composite                              | Soft-template route                          | C <sub>12</sub> H <sub>25</sub> -Si; CTAB; Resorcinol; Formaldehyde | 800 °C for 3 h; Ar                                                 | 1.8 mAh cm <sup>-2</sup>  | 43%   | [6]  |
| Nanoporous Silicon from Commercial Alloy                                    | Vacuum distillation                          | Mg <sub>2</sub> Si                                                  | 900 °C; 10 Pa or lower                                             | 2.7 mAh cm <sup>-2</sup>  | 85%   | [7]  |
| Silicon Anode Enhanced by “Sticky” Mucin-Inspired DNA-Polysaccharide Binder | Electrophoresis                              | Si nano powder; Alginate; Deoxyribonucleic acid                     | 100 V for 25 min                                                   | 2.4 mAh cm <sup>-2</sup>  | 84.6% | [8]  |
| Silicon Particle Anode Fabricated by Scalable Mechanical Pressing           | Dry press                                    | Tetraethoxysilane; Si nanoparticles; Resorcinol; Formaldehyde       | 17.6 MPa to 123 MPa                                                | 3.5 mAh cm <sup>-2</sup>  | 76.9  | [9]  |
| Silicon-nanolayer-embedded Graphite anode                                   | Chemical vapor deposition                    | Spherical graphite; Silane gas; High-purity acetylene               | 900 °C for 8 min                                                   | 3.3 mAh cm <sup>-2</sup>  | 92%   | [10] |



|                                                             |                                                   |                                                                    |                                 |                          |       |           |
|-------------------------------------------------------------|---------------------------------------------------|--------------------------------------------------------------------|---------------------------------|--------------------------|-------|-----------|
| Silicon anode with all-carbon graphdiyne in-situ weaved     | Cu catalyzed graphdiyne                           | Hexakis[(trimethylsilyl)ethynyl] benzene; Cu nanowire              | Liquid-phase catalysis for 48 h | 4.9 mAh cm <sup>-2</sup> | 67%   | [11]      |
| Amorphous TiO <sub>2</sub> layer cooperated Si nanoparticle | Sol-gel approach                                  | Titanium isopropylate; Si nanoparticle; Resorcinol; - Formaldehyde | 700 °C for 3 h; N <sub>2</sub>  | 1.1 mAh cm <sup>-2</sup> | 86.1% | [12]      |
| Porous silicon anode with CVD induced carbon infilling      | Thermal decomposition                             | SiO powder; Acetylene                                              | 950 °C for 5h; Ar               | 3.5 mAh cm <sup>-2</sup> | 77%   | [13]      |
| KGM/Si@SiO <sub>2</sub> electrode                           | Liquid oxidation                                  | Sulfuric acid; Hydrogen peroxide; Si nanoparticles                 | 80 °C for 2h                    | 1.6 mAh cm <sup>-2</sup> | 78.1% | [14]      |
| amorphous silicon nanolayer/activated graphite anode        | Chemical vapor deposition                         | Graphite; Nickel chloride; Ethane; Silane                          | 1000 °C for 3 h; H <sub>2</sub> | 3.5 mAh cm <sup>-2</sup> | 93.8% | [15]      |
| LB-Si/CT@G                                                  | Low-temperature boron modification; Ball milling; | Bulk Si; Carbon nanotube; Graphite                                 | 525 °C for 5 h; Ar              | 7.4 mAh cm <sup>-2</sup> | 88%   | This work |

## Reference

- [1] Ting He, Jianrui Feng, Yan Zhang, et al., Stress-Relieved Nanowires by Silicon Substitution for High-Capacity and Stable Lithium Storage, *Adv. Energy Mater.* 8 (2018) 1702805.
- [2] Shanshan Zhu, Jianbin Zhou, Yong Guan, et al., Hierarchical Graphene-Scaffolded Silicon/Graphite Composites as High Performance Anodes for Lithium-Ion Batteries, *Small* 14 (2018) 1802457.
- [3] Myungbeom Sohn, Dong Geun Lee, Hyeong-Il Park, et al., Microstructure Controlled Porous Silicon Particles as a High Capacity Lithium Storage Material via Dual Step Pore Engineering, *Adv. Funct. Mater.* 28 (2018) 1800855.
- [4] Min-Gi Jeong, Hoang Long Du, Mobinul Islam, et al., Self-rearrangement of silicon nanoparticles embedded in micron carbon sphere framework for high-energy and long-life lithium-ion batteries, *Nano Lett.* 17 (2017) 5600-5606.
- [5] Yoonkook Son, Soojin Sim, Hyunsoo Ma, et al., Exploring Critical Factors Affecting Strain Distribution in 1D Silicon-Based Nanostructures for Lithium-Ion Battery Anodes, *Adv. Mater.* 30 (2018) 1705430.
- [6] Haiping Su, Alejandro A. Barragan, Linxiao Geng, et al., Colloidal Synthesis of Silicon@Carbon Composite Materials for Lithium-Ion Batteries, *Angew. Chem. Int. Edit.* 56 (2017) 10780-10785.
- [7] Yongling An, Huifang Fei, Guifang Zeng, et al., Green, Scalable and Controllable Fabrication of Nanoporous Silicon from Commercial Alloy Precursor for High-Energy Lithium-Ion Batteries, *ACS Nano* 12 (2018) 4993-5002.
- [8] Sunjin Kim, You Kyeong Jeong, Younseon Wang, et al., A “Sticky” Mucin-Inspired DNA-Polysaccharide Binder for Silicon and Silicon-Graphite Blended Anodes in Lithium-Ion Batteries, *Adv. Mater.* 30 (2018)

1707594.

- [9] Dingchang Lin, Zhenda Lu, Po-Chun Hsu, et al., High Tap Density Secondary Silicon Particle Anodes by Scalable Mechanical Pressing for Lithium-ion Batteries, *Energy Environ. Sci.* 8 (2015) 2371-2376.
- [10] Minseong Ko, Sujong Chae, Jiyoung Ma, et al., Scalable synthesis of silicon-nanolayer-embedded graphite for high-energy lithium-ion batteries, *Nature Energy* 1 (2016) 16113.
- [11] Hong Shang, Zicheng Zuo, Le Yu, et al., Low-Temperature Growth of All-Carbon Graphdiyne on a Silicon Anode for High-Performance Lithium-Ion Batteries, *Adv. Mater.* 2018, 30, 1801459.
- [12] Jianping Yang, Yunxiao Wang, Wei Li, et al., Amorphous TiO<sub>2</sub> Shells: A Vital Elastic Buffering Layer on Silicon Nanoparticles for High-Performance and Safe Lithium Storage, *Adv. Mater.* 2017, 29, 1700523.
- [13] Ran Yi , Fang Dai , Mikhail L. Gordin, et al., Micro-sized Si-C Composite with Interconnected Nanoscale Building Blocks as High-Performance Anodes for Practical Application in Lithium-Ion Batteries, *Adv. Energy Mater.* 2013, 3, 295–300.
- [14] Songtao Guo, Heng Li, Yaqian Li, et al., SiO<sub>2</sub>-Enhanced Structural Stability and Strong Adhesion with a New Binder of Konjac Glucomannan Enables Stable Cycling of Silicon Anodes for Lithium-Ion Batteries, *Adv. Energy Mater.* 2018, 8, 1800434.
- [15] Namhyung Kim, Sujong Chae, Jiyoung Ma, et al., Fast-charging high-energy lithium-ion batteries via implantation of amorphous silicon nanolayer in edge-plane activated graphite anodes, *Nature Comm.* 8(2017) 812.
